# Supplementary material
Source: PubMed Central journal article supplement (PMC6374207)
Supplement: NIHMS989183-supplement-SI.pdf [file NIHMS989183-supplement-SI.pdf]

## **Supporting Information**

# **Insights into the Allosteric Mechanism of Setmelanotide (RM-493) as a Potent and First-in-class Melanocortin-4 Receptor (MC4R) Agonist to Treat Rare Genetic Disorders of Obesity through an *in silico* Approach**

Bethany A. Falls<sup>[a]</sup> and Yan Zhang<sup>\*[a]</sup>

<sup>[a]</sup> *Department of Medicinal Chemistry, Virginia Commonwealth University, 800 East Leigh Street, Richmond, VA 23298, USA*

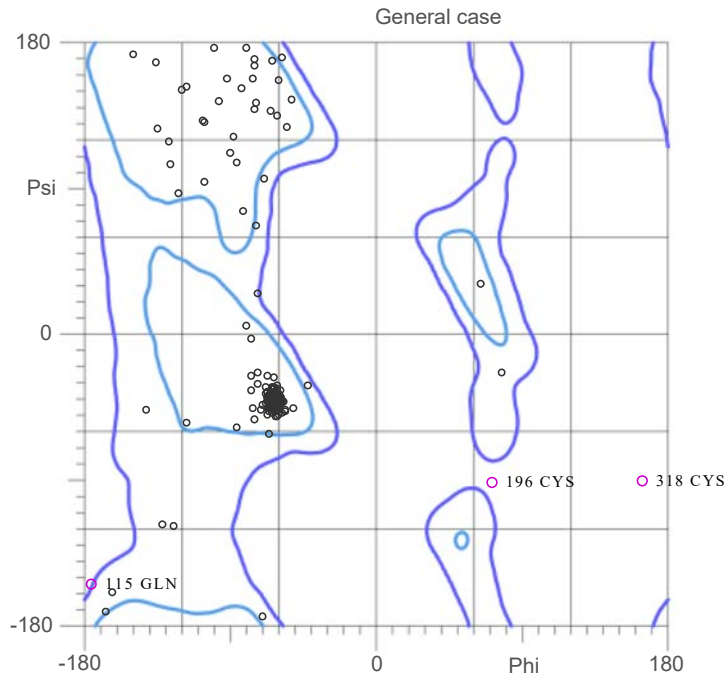

**Figure S1.** Ramachandran plot generated for generated homology model by molprobity. 93.2% (261/280) of all residues were in favored (98%) regions. 98.6% (276/280) of all residues were in allowed (>99.8%) regions

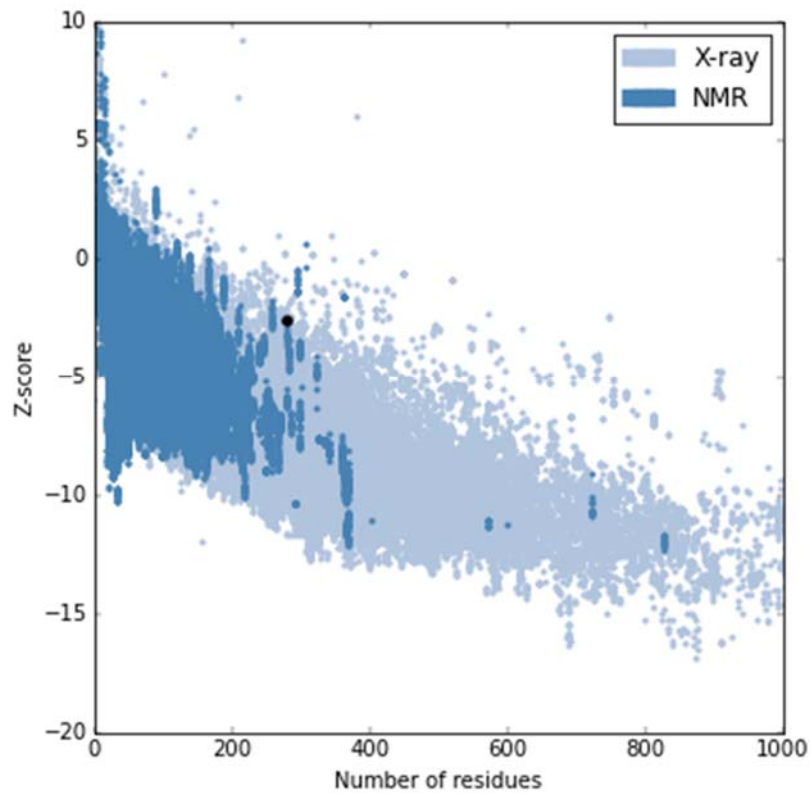

**Figure S2.** MC4R homology model ProSA plot. Overall model quality z-score is -2.56, which falls into the range of scores typically found for native proteins of similar size.
